# Supplementary material for: Transcriptome Analysis Reveals MAPK/AMPK as a Key Regulator of the Inflammatory Response in PST Detoxification in Mytilus galloprovincialis and Argopecten irradians
Source: MDPI journal article supplement (doi:10.3390/toxins14080516), 2022-07-28
Supplement: s1 [file s1]

# Supplementary Materials: Transcriptome Analysis Reveals MAPK/AMPK as a Key Regulator of the Inflammatory Response in PST Detoxification in *Mytilus galloprovincialis* and *Argopecten irradians*

Chenfan Dong, Haiyan Wu, Guanchao Zheng, Jixing Peng, Mengmeng Guo and Zhijun Tan

**Table S1.** Distribution dynamics of *Alexandrium catenella* cells.

| Date                  | 3.20 | 3.29 | 4.2  | 4.8  | 4.11 | 4.16 | 4.19 | 4.23 | 4.27 | 5.2  | 5.7  | 5.13 |
|-----------------------|------|------|------|------|------|------|------|------|------|------|------|------|
| Abundances            | 193  | 560  | 1000 | 2446 | 2910 | 3396 | 2656 | 2043 | 1163 | 743  | 493  | 223  |
| Cells·L <sup>-1</sup> | ±12  | ±53  | ±100 | ±150 | ±130 | ±155 | ±150 | ±235 | ±152 | ±121 | ±101 | ±40  |

**Table S2.** Summary of transcriptome sequencing.

| Species                     | Libraries | Raw reads | Clean reads | Average reads length (bp) | Q30 (%) | GC (%) |
|-----------------------------|-----------|-----------|-------------|---------------------------|---------|--------|
| <i>M. galloprovincialis</i> | 1         | 73063150  | 72998660    | 150                       | 93.69%  | 44.26% |
|                             | 2         | 54171196  | 54109470    | 150                       | 93.39%  | 44.26% |
|                             | 3         | 58196756  | 58142204    | 150                       | 93.63%  | 43.34% |
|                             | 4         | 53820646  | 53776456    | 150                       | 93.82%  | 43.60% |
|                             | 5         | 56362972  | 56313774    | 150                       | 94.28%  | 43.68% |
|                             | 6         | 47209170  | 47164074    | 150                       | 93.68%  | 45.12% |
|                             | 7         | 58189742  | 58146404    | 150                       | 94.14%  | 47.04% |
|                             | 8         | 62910802  | 62849256    | 150                       | 93.19%  | 45.23% |
|                             | 9         | 64824906  | 64753942    | 150                       | 93.03%  | 45.24% |
| <i>A. irradians</i>         | 1         | 50033282  | 49974964    | 150                       | 94.2%   | 46.58% |
|                             | 2         | 51502068  | 51432052    | 150                       | 93.52%  | 46.56% |
|                             | 3         | 46783174  | 46713534    | 150                       | 94.02%  | 45.96% |
|                             | 4         | 52632854  | 52556582    | 150                       | 93.38%  | 45.60% |
|                             | 5         | 50350636  | 50286476    | 150                       | 94.11%  | 47.92% |
|                             | 6         | 54297322  | 54219582    | 150                       | 93.03%  | 47.08% |
|                             | 7         | 60582164  | 60492530    | 150                       | 93.39%  | 45.74% |
|                             | 8         | 42911322  | 42870610    | 150                       | 94.27%  | 47.79% |
|                             | 9         | 51756686  | 51673074    | 150                       | 92.81%  | 45.42% |

**Table S3.** Summary of reads annotation.

|                | <i>M. galloprovincialis</i> | <i>A. irradians</i> |
|----------------|-----------------------------|---------------------|
| Total Unigenes | 100863                      | 70011               |
| Nr             | 45015                       | 28827               |
| Swissport      | 22297                       | 15949               |
| KOG            | 18040                       | 13294               |
| Kegg           | 20795                       | 14761               |

|                                |       |       |
|--------------------------------|-------|-------|
| Annotation gene                | 45220 | 29572 |
| Without annotation gene number | 55643 | 40439 |

**Table S4.** KEGG enrichment results of TOP30.

|                             | Pathway ID | Pathway name                                     | Number of DEGs |
|-----------------------------|------------|--------------------------------------------------|----------------|
| <i>A. irradians</i>         | KO04151    | PI3K-Akt signaling pathway                       | 357            |
|                             | KO04210    | Apoptosis                                        | 344            |
|                             | KO04145    | Phagosome                                        | 332            |
|                             | KO04921    | Oxytocin signaling pathway                       | 319            |
|                             | KO04142    | Lysosome                                         | 314            |
|                             | KO04020    | Calcium signaling pathway                        | 308            |
|                             | KO04022    | cGMP - PKG signaling pathway                     | 240            |
|                             | KO04024    | cAMP signaling pathway                           | 240            |
|                             | KO04010    | MAPK signaling pathway                           | 234            |
|                             | KO04120    | Ubiquitin mediated proteolysis                   | 204            |
|                             | KO04371    | Apelin signaling pathway                         | 194            |
|                             | KO04070    | Phosphatidylinositol signaling system            | 175            |
|                             | KO04512    | ECM-receptor interaction                         | 166            |
|                             | KO04750    | Inflammatory mediator regulation of TRP channels | 166            |
|                             | KO04625    | C-type lectin receptor signaling pathway         | 163            |
|                             | KO04146    | Peroxisome                                       | 151            |
|                             | KO00480    | Glutathione metabolism                           | 142            |
|                             | KO04612    | Antigen processing and presentation              | 130            |
|                             | KO04150    | mTOR signaling pathway                           | 129            |
|                             | KO04066    | HIF-1 signaling pathway                          | 128            |
|                             | KO04668    | TNF signaling pathway                            | 128            |
|                             | KO04624    | Toll and Imd signaling pathway                   | 115            |
|                             | KO04152    | AMPK signaling pathway                           | 106            |
|                             | KO04330    | Notch signaling pathway                          | 104            |
|                             | KO03320    | PPAR signaling pathway                           | 101            |
|                             | KO00980    | Metabolism of xenobiotics by cytochrome P450     | 88             |
|                             | KO04657    | IL-17 signaling pathway                          | 84             |
|                             | KO04666    | Fc gamma R-mediated phagocytosis                 | 80             |
|                             | KO04115    | p53 signaling pathway                            | 56             |
|                             | KO04630    | Jak-STAT signaling pathway                       | 38             |
| <i>M. galloprovincialis</i> | KO04015    | Rap1 signaling pathway                           | 401            |
|                             | KO04921    | Oxytocin signaling pathway                       | 389            |
|                             | KO04014    | Ras signaling pathway                            | 341            |
|                             | KO04010    | MAPK signaling pathway                           | 332            |
|                             | KO04020    | Calcium signaling pathway                        | 313            |
|                             | KO04022    | cGMP - PKG signaling pathway                     | 310            |
|                             | KO04621    | NOD-like receptor signaling pathway              | 304            |

|         |                                              |     |
|---------|----------------------------------------------|-----|
| KO04024 | cAMP signaling pathway                       | 290 |
| KO04512 | ECM-receptor interaction                     | 285 |
| KO04064 | NF-kappa B signaling pathway                 | 245 |
| KO00480 | Glutathione metabolism                       | 228 |
| KO04625 | C-type lectin receptor signaling pathway     | 214 |
| KO04371 | Apelin signaling pathway                     | 213 |
| KO04668 | TNF signaling pathway                        | 213 |
| KO04670 | Leukocyte transendothelial migration         | 210 |
| KO04612 | Antigen processing and presentation          | 207 |
| KO04912 | GnRH signaling pathway                       | 197 |
| KO04066 | HIF-1 signaling pathway                      | 189 |
| KO04150 | mTOR signaling pathway                       | 179 |
| KO04330 | Notch signaling pathway                      | 175 |
| KO04624 | Toll and Imd signaling pathway               | 174 |
| KO04310 | Wnt signaling pathway                        | 173 |
| KO04657 | IL-17 signaling pathway                      | 140 |
| KO00980 | Metabolism of xenobiotics by cytochrome P450 | 139 |
| KO03320 | PPAR signaling pathway                       | 139 |
| KO04152 | AMPK signaling pathway                       | 138 |
| KO04115 | p53 signaling pathway                        | 125 |
| KO04666 | Fc gamma R-mediated phagocytosis             | 107 |
| KO04660 | T cell receptor signaling pathway            | 89  |
| KO04630 | Jak-STAT signaling pathway                   | 48  |

**Table S5.** Results of toxin concentration ( $\mu\text{g STX eq/kg}$ ).

| <i>M. galloprovincialis</i> |                |                 |                   |                   |                   |                   |                 |                 |          |
|-----------------------------|----------------|-----------------|-------------------|-------------------|-------------------|-------------------|-----------------|-----------------|----------|
| Date                        | STX<br>(TEF=1) | GTX1<br>(TEF=1) | GTX2<br>(TEF=0.4) | GTX3<br>(TEF=0.6) | GTX4<br>(TEF=0.7) | GTX5<br>(TEF=0.1) | C1<br>(TEF=0.1) | C2<br>(TEF=0.1) | Content  |
| 4.2                         | 0.000          | 582.570         | 0.000             | 19.342            | 426.978           | 0.000             | 0.000           | 0.000           | 893.060  |
| 4.8                         | 140.196        | 2778.853        | 144.081           | 109.407           | 1276.060          | 0.000             | 6.984           | 6.228           | 3936.889 |
| 4.11                        | 156.477        | 2965.478        | 61.416            | 61.451            | 1579.437          | 0.000             | 9.674           | 8.651           | 4290.830 |
| 4.16                        | 0.000          | 3938.977        | 250.910           | 623.582           | 1701.856          | 0.000             | 0.000           | 0.000           | 5604.789 |
| 4.19                        | 73.136         | 1295.834        | 328.317           | 771.545           | 681.590           | 0.000             | 0.000           | 0.000           | 2440.337 |
| 4.23                        | 71.782         | 668.912         | 471.328           | 1057.776          | 293.802           | 0.000             | 0.000           | 0.000           | 1769.553 |
| 4.27                        | 37.922         | 826.867         | 16.406            | 31.609            | 425.387           | 0.000             | 0.000           | 0.000           | 1188.088 |
| 5.02                        | 53.246         | 445.110         | 68.311            | 152.506           | 202.212           | 0.000             | 0.000           | 0.000           | 758.732  |
| 5.07                        | 0.000          | 365.509         | 40.007            | 81.554            | 154.325           | 0.000             | 0.000           | 0.000           | 538.471  |
| 5.13                        | 80.923         | 118.497         | 64.192            | 24.194            | 30.683            | 0.000             | 0.000           | 0.000           | 261.091  |
| 5.27                        | 0.000          | 10.707          | 40.622            | 40.586            | 11.459            | 0.000             | 0.000           | 0.000           | 59.328   |
| <i>A. irradians</i>         |                |                 |                   |                   |                   |                   |                 |                 |          |
| Date                        | STX<br>(TEF=1) | GTX1<br>(TEF=1) | GTX2<br>(TEF=0.4) | GTX3<br>(TEF=0.6) | GTX4<br>(TEF=0.7) | GTX5<br>(TEF=0.1) | C1<br>(TEF=0.1) | C2<br>(TEF=0.1) | Content  |

|      |        |         |         |          |         |        |        |        |          |
|------|--------|---------|---------|----------|---------|--------|--------|--------|----------|
| 4.2  | 8.370  | 33.098  | 4.239   | 6.801    | 43.022  | 3.933  | 8.130  | 5.297  | 79.096   |
| 4.8  | 15.049 | 107.541 | 15.509  | 12.981   | 143.041 | 0.000  | 3.838  | 1.937  | 237.289  |
| 4.11 | 35.940 | 354.415 | 31.431  | 20.382   | 251.024 | 0.000  | 16.800 | 6.647  | 593.218  |
| 4.16 | 60.984 | 0.000   | 215.468 | 1472.011 | 0.000   | 0.000  | 0.000  | 0.000  | 1030.378 |
| 4.19 | 46.740 | 37.510  | 185.444 | 900.865  | 27.060  | 27.054 | 0.000  | 0.000  | 720.593  |
| 4.23 | 29.906 | 0.000   | 95.975  | 999.512  | 13.012  | 0.000  | 0.000  | 0.000  | 677.112  |
| 4.27 | 88.554 | 426.187 | 51.111  | 34.590   | 125.941 | 0.000  | 0.000  | 0.000  | 644.098  |
| 5.02 | 29.200 | 0.000   | 111.627 | 778.961  | 17.560  | 21.614 | 0.000  | 0.000  | 555.681  |
| 5.07 | 12.217 | 227.523 | 53.303  | 266.214  | 140.147 | 0.000  | 0.000  | 0.000  | 518.892  |
| 5.13 | 78.150 | 102.302 | 149.013 | 207.479  | 67.411  | 0.000  | 35.567 | 12.333 | 416.523  |
| 5.27 | 66.559 | 0.000   | 24.258  | 21.656   | 0.000   | 0.000  | 0.000  | 0.000  | 89.256   |

**Table S6.** Concentration of mixed standard solution.

|          | 500PPB | 200PPB | 100PPB | 50PPB | 20PPB | 10PPB |
|----------|--------|--------|--------|-------|-------|-------|
| C1&2-b   | 669.03 | 267.61 | 133.81 | 66.90 | 26.76 | 13.38 |
|          | 200.00 | 80.00  | 40.00  | 20.00 | 8.00  | 4.00  |
| GTX1&4-d | 635.56 | 254.22 | 127.11 | 63.56 | 25.42 | 12.71 |
|          | 200.00 | 80.00  | 40.00  | 20.00 | 8.00  | 4.00  |
| GTX2&3-d | 471.72 | 188.69 | 94.34  | 47.17 | 18.87 | 9.43  |
|          | 200.00 | 80.00  | 40.00  | 20.00 | 8.00  | 4.00  |
| GTX5-c   | 500.00 | 200.00 | 100.00 | 50.00 | 20.00 | 10.00 |
| STX-f    | 500.00 | 200.00 | 100.00 | 50.00 | 20.00 | 10.00 |

**Table S7.** Results of quality control.

|      |                                                                                     |
|------|-------------------------------------------------------------------------------------|
| STX  | 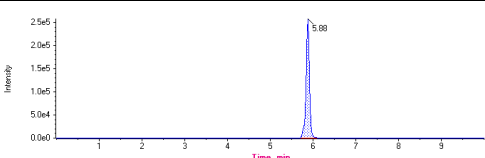 |
| GTX1 |  |
| GTX2 |  |
| GTX3 |  |

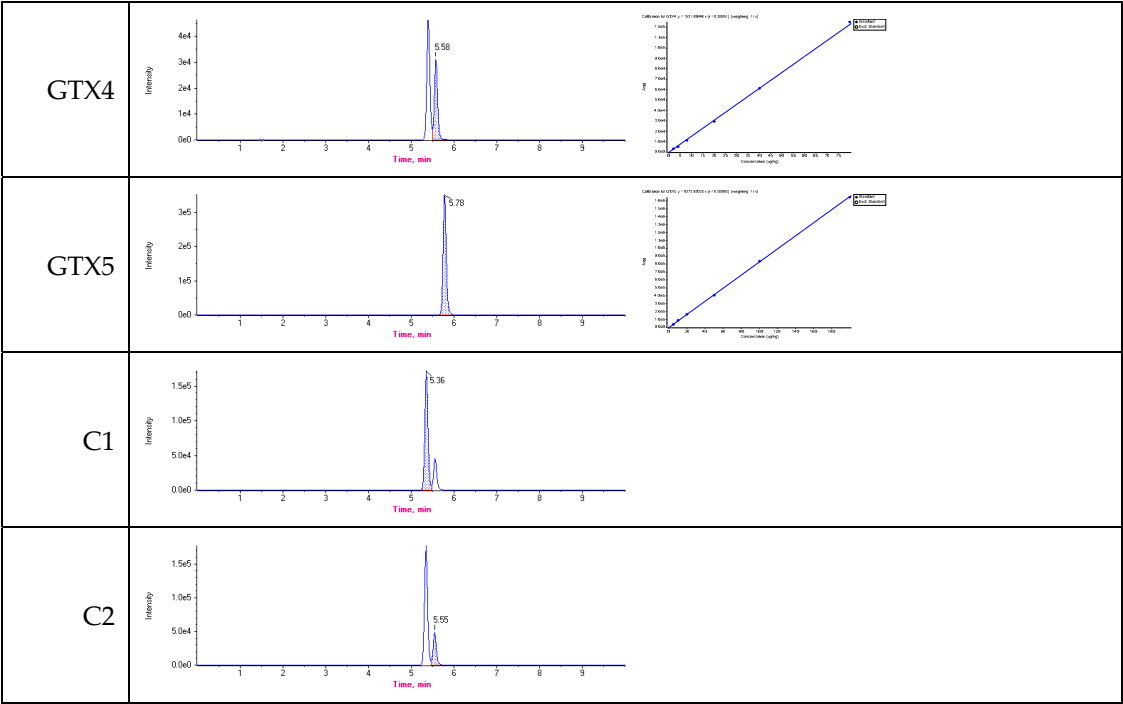

**Table S8.** PCR primer list.

|             | <i>A. irridians</i> |                        |      | <i>M. galloprovincialis</i> |                         |      |
|-------------|---------------------|------------------------|------|-----------------------------|-------------------------|------|
| Gene symbol |                     | 5'--3'                 | Tm   |                             | 5'--3'                  | Tm   |
| Traf3       | Ai-traf3-Fw         | CTTGGAACCCCGACGATAC    | 61.6 | Me-traf3-Fw                 | AGCCCCACCTTCTACATCCT    | 57.6 |
|             | Ai-traf3-Rv         | GAACATCCTTCAGACGCCCT   | 58.9 | Me-traf3-Rv                 | TCCTGCTGTCCCACAATCAC    | 58.6 |
| MAP3K7      | Ai-map3k7-Fw        | GCGGGGTGTATCCTGAGAG    | 59.4 | Me-map3k7-Fw                | GGGGTAAGGTGTTATTGGCT    | 59.9 |
|             | Ai-map3k7-Rv        | CACCTTCCTTAGCAGCGAGT   | 57.2 | Me-map3k7-Rv                | AACAGTAGTAGTGGCAGCAGT   | 51.8 |
| Birc2       | Ai-birc2-Fw         | TACACTGGAAGGTGGGGATG   | 57.8 | -                           | -                       | -    |
|             | Ai-birc2-Rv         | GGCTGAGACTGGCGATAGAG   | 57.3 | -                           | -                       | -    |
| NF-κB1      | Ai-nfkb1-Fw         | GACCCTATCTGCGTTGCTGG   | 60.5 | Me-nfkb1-Fw                 | GCTGCCAAATGTAAGGGTGTC   | 59.7 |
|             | Ai-nfkb1-Rv         | TTCTGTGCGCTGGAAACCT    | 59.7 | Me-nfkb1-Rv                 | TGCGAAAAAGCCTCCAATGT    | 60.7 |
| CDC42       | Ai-cdc42-Fw         | ACTGCGGAACCTTCAACCC    | 59   | Me-cdc42-Fw                 | CGGCTTCAAAACAGCAGAGT    | 58   |
|             | Ai-cdc42-Rv         | CATTCACTGGCTTCGGGCA    | 64   | Me-cdc42-Rv                 | GCAAGAGAACTAAGGGCGGT    | 58.7 |
| RAC1        | Ai-rac1-Fw          | CCAGCCACACTGCTACTTCA   | 56.8 | Me-rac1-Fw                  | CCAGTCCCTGTGGGTATGT     | 54.7 |
|             | Ai-rac1-Rv          | GCCCCAGTTTCACGACCATT   | 62.1 | Me-rac1-Rv                  | GGTTGGTGATGGTGTGTTG     | 59   |
| PPP2R1A     | Ai-ppp2r1a-Fw       | CATCTGTGCCCCTGTTCT     | 59.6 | Me-ppp2r1a-Fw               | CTGACGACTCTCTACCCAA     | 54.3 |
|             | Ai-ppp2r1a-Rv       | GTTCAATGTCGCTGCCTCAC   | 58.6 | Me-ppp2r1a-Rv               | ACGCCAAGTGCCAATGCT      | 59.5 |
| CSNK2B      | Ai-csnk2b-Fw        | CACCCCTAAGTCATCTCGCC   | 59.4 | Me-csnk2b-Fw                | TTGGTTTGTGGATTGAGAGG    | 57.6 |
|             | Ai-csnk2b-Rv        | GCAGGTCGTTTGGTCTGTATTC | 60.6 | Me-csnk2b-Rv                | CCAAAATAGGCTCCATCAGTGT  | 58.6 |
| GADD45A     | Ai-gadd45a-Fw       | GGATGACTGGGCGTGATAA    | 60.4 | -                           | -                       | -    |
|             | Ai-gadd45a-Rv       | CCTACTGCTGGGAGAACGAC   | 57.1 | -                           | -                       | -    |
| DUSP7       | Ai-dusp7-Fw         | ACAGTTGGCGGTTTGATTGG   | 62.3 | Me-dusp7-Fw                 | ACGAGACTTATGCGAAGGGAC   | 58.6 |
|             | Ai-dusp7-Rv         | CTGTCTGGCGGGCATTAGTC   | 60.5 | Me-dusp7-Rv                 | TGGGTATTGTGAGCGAGGTG    | 59   |
| GAPDH       | Ai-gapdh-Fw         | AACGGTCTTCTGTGTAGCGG   | 57.7 | Me-gapdh-Fw                 | ACAGTTGAAGCAAAGGATGGA   | 57.3 |
|             | Ai-gapdh-Rv         | ATTCTTGGGGTTCTGCTGG    | 61.3 | Me-gapdh-Rv                 | GGTTGTGAAGACACCAGTAGA   | 52.1 |
| JUN         | -                   | -                      | -    | Me-jun-Fw                   | TGAACACATAGTCAAGGCACAGA | 58.3 |
|             | -                   | -                      | -    | Me-jun-Rv                   | ACGACAGGATGAAGAACCACA   | 57.5 |

|         |   |   |   |               |                       |      |
|---------|---|---|---|---------------|-----------------------|------|
| GADD45B | - | - | - | Me-gadd45b-Fw | TGCTGTCTGTCTTAGCGTTCT | 55.3 |
|         | - | - | - | Me-gadd45b-Rv | GGCACAGGAAGATGGCAGA   | 58.8 |
